# Supplementary material
Source: publisher figshare collection journal article supplement (https://springernature.figshare.com/ndownloader/files/15470036)
Supplement: Supplementary file 1 [file 15470036]

## Sheet: Read Me
A list of benchmark articles that were used to assess our search string and key words

## Sheet: Benchmark articles
1. Shannon G, McKenna MF, Angeloni LM, Crooks KR, Fristrup KM, Brown E, et al. 2016. A synthesis of two decades of research documenting the effects of noise on wildlife. Biological Reviews, 91:982-1005.
2. Hotchkin C, Parks S. 2013. The Lombard effect and other noise-induced vocal modifications: insight from mammalian communication systems. Biological Reviews, 88:809-824.
3. Roca IT, Desrochers L, Giacomazzo M, Bertolo A, Bolduc P, Deschesnes R, et al. 2016. Shifting song frequencies in response to anthropogenic noise: a meta-analysis on birds and anurans. Behavioral Ecology, 27:1269-1274.
4. Patricelli GL, Blickley JL. 2006. Avian communication in urban noise: causes and consequences of vocal adjustment. Auk, 123:639-649.
